# Supplementary material
Source: Springer Nature journal article supplement (https://www.springermedizin.de/resource/supplementary/13058_2010_2751_MOESM5_ESM.pdf/9702078)
Supplement: MOESM5 [file 9702078]

Method

## ER-positive training set

List of most associated\* SNPs from single marker case-control analysis using either Finnish or Swedish ER-positive cases

\* denotes all SNPs with p-values below a specified cut-off threshold (e.g.  $P < 0.05$  or  $P < 0.5$ )

## Independent target sets

1. Scores are calculated based on reference alleles of SNPs below selected threshold in the training set

2. Mean scores of ER-positive cases are then compared with mean scores of controls, to see whether the same SNPs that have different frequencies among cases and controls in the training set can also differentiate cases and controls in the target sets.

Analysis

SNPs derived from Finnish ER-positive cases and controls

Applied to:

Target set 1: Swedish ER-positive cases and controls (serves as a positive control)

Target set 2: Swedish ER-negative cases and controls

SNPs derived from Swedish ER-positive cases and controls

Applied to:

Target set 1: Finnish ER-positive cases and controls (serves as a positive control)

Target set 2: Finnish ER-negative cases and controls
